# Supplementary material for: Structural Elucidation of a Protective B Cell Epitope on Outer Surface Protein C (OspC) of the Lyme Disease Spirochete, Borreliella burgdorferi
Source: PubMed Central journal article supplement (PMC10128040; doi:10.1128/mbio.02981-22), 2023-03-28
Supplement: mbio.02981-22-s0001.pdf [file mbio.02981-22-s0001.pdf]

| <b>Table S1. Data associated with crystal structures reported in this study.</b>                                                                                                                                                                                                                                                                                                                                                                                                                                                                                                                                                                                                                                                                                                                                                                                       |                                  |                               |                               |
|------------------------------------------------------------------------------------------------------------------------------------------------------------------------------------------------------------------------------------------------------------------------------------------------------------------------------------------------------------------------------------------------------------------------------------------------------------------------------------------------------------------------------------------------------------------------------------------------------------------------------------------------------------------------------------------------------------------------------------------------------------------------------------------------------------------------------------------------------------------------|----------------------------------|-------------------------------|-------------------------------|
| <b>Data Collection</b>                                                                                                                                                                                                                                                                                                                                                                                                                                                                                                                                                                                                                                                                                                                                                                                                                                                 |                                  |                               |                               |
| Complex                                                                                                                                                                                                                                                                                                                                                                                                                                                                                                                                                                                                                                                                                                                                                                                                                                                                | OspC <sub>A</sub> -B5            | OspC <sub>B</sub>             | OspC <sub>K</sub>             |
| Space group                                                                                                                                                                                                                                                                                                                                                                                                                                                                                                                                                                                                                                                                                                                                                                                                                                                            | P2 <sub>1</sub> 2 <sub>1</sub> 2 | P2 <sub>1</sub>               | P2 <sub>1</sub>               |
| Cell parameters: <i>a, b, c</i><br>(Å) / β (°)                                                                                                                                                                                                                                                                                                                                                                                                                                                                                                                                                                                                                                                                                                                                                                                                                         | 54.7 / 139.8 / 205.7             | 42.9 / 44.1 / 68.8 /<br>103.8 | 52.3 / 52.3 / 116.7 /<br>92.5 |
| BNL Beamline                                                                                                                                                                                                                                                                                                                                                                                                                                                                                                                                                                                                                                                                                                                                                                                                                                                           | 21-ID-E                          | 21-ID-E                       | 21-ID-E                       |
| Resolution range <sup>a</sup> (Å)                                                                                                                                                                                                                                                                                                                                                                                                                                                                                                                                                                                                                                                                                                                                                                                                                                      | 50-2.70 (2.75-2.70)              | 50-1.50 (1.53-1.50)           | 50-1.95 (1.98-1.95)           |
| wavelength (Å)                                                                                                                                                                                                                                                                                                                                                                                                                                                                                                                                                                                                                                                                                                                                                                                                                                                         | 0.979                            | 0.979                         | 0.979                         |
| No. of reflections                                                                                                                                                                                                                                                                                                                                                                                                                                                                                                                                                                                                                                                                                                                                                                                                                                                     | 3988365                          | 3312121                       | 2685656                       |
| Average redundancy <sup>a</sup>                                                                                                                                                                                                                                                                                                                                                                                                                                                                                                                                                                                                                                                                                                                                                                                                                                        | 2.8 (2.7)                        | 2.7 (2.4)                     | 2.8 (2.6)                     |
| ( <i>I</i> )/( <i>δ</i> ) <sup>a</sup>                                                                                                                                                                                                                                                                                                                                                                                                                                                                                                                                                                                                                                                                                                                                                                                                                                 | 21.1 (1.2)                       | 31.5 (3.2)                    | 17.6 (1.7)                    |
| Completeness <sup>a</sup> (%)                                                                                                                                                                                                                                                                                                                                                                                                                                                                                                                                                                                                                                                                                                                                                                                                                                          | 99.6 (99.6)                      | 95.8 (95.6)                   | 97.8 (99.2)                   |
| <i>R</i> <sub>merge</sub> <sup>a, b</sup> (%)                                                                                                                                                                                                                                                                                                                                                                                                                                                                                                                                                                                                                                                                                                                                                                                                                          | 8.3 (145.0)                      | 5.9 (32.5)                    | 14.9 (131.1)                  |
| CC <sub>1/2</sub> <sup>a, c</sup>                                                                                                                                                                                                                                                                                                                                                                                                                                                                                                                                                                                                                                                                                                                                                                                                                                      | (0.50)                           | (0.93)                        | (0.54)                        |
| <b>Refinement</b>                                                                                                                                                                                                                                                                                                                                                                                                                                                                                                                                                                                                                                                                                                                                                                                                                                                      |                                  |                               |                               |
| Bragg spacings <sup>a</sup> (Å)                                                                                                                                                                                                                                                                                                                                                                                                                                                                                                                                                                                                                                                                                                                                                                                                                                        | 49.4-2.7 (2.76-2.70)             | 36.8-1.5 (1.54-1.50)          | 39.7-1.95 (1.99-1.95)         |
| <i>R</i> <sup>d</sup> / <i>R</i> <sub>free</sub> <sup>e</sup> (%)                                                                                                                                                                                                                                                                                                                                                                                                                                                                                                                                                                                                                                                                                                                                                                                                      | 20.4 / 25.6                      | 14.7 / 16.7                   | 19.3 / 22.8                   |
| No. of Protein atoms                                                                                                                                                                                                                                                                                                                                                                                                                                                                                                                                                                                                                                                                                                                                                                                                                                                   | 8825                             | 4908                          | 4708                          |
| No. of Waters                                                                                                                                                                                                                                                                                                                                                                                                                                                                                                                                                                                                                                                                                                                                                                                                                                                          | 32                               | 270                           | 358                           |
| RMSD bond length (Å)                                                                                                                                                                                                                                                                                                                                                                                                                                                                                                                                                                                                                                                                                                                                                                                                                                                   | 0.005                            | 0.012                         | 0.003                         |
| RMSD bond angle (°)                                                                                                                                                                                                                                                                                                                                                                                                                                                                                                                                                                                                                                                                                                                                                                                                                                                    | 0.78                             | 1.14                          | 0.52                          |
| Ramachandran<br>favored / allowed <sup>f</sup> (%)                                                                                                                                                                                                                                                                                                                                                                                                                                                                                                                                                                                                                                                                                                                                                                                                                     | 94.8 / 99.8                      | 97.4 / 100                    | 97.0 / 100                    |
| PDB code                                                                                                                                                                                                                                                                                                                                                                                                                                                                                                                                                                                                                                                                                                                                                                                                                                                               | <b>7UIJ</b>                      | <b>7UJ2</b>                   | <b>7UJ6</b>                   |
| <sup>a</sup> Values in outermost shell are given in parentheses.<br><sup>b</sup> $R_{\text{merge}} = (\sum  I_i - \langle I_i \rangle ) / \sum  I_i $ , where <i>I<sub>i</sub></i> is the integrated intensity of a given reflection.<br><sup>c</sup> $CC_{1/2} = (1 + q^2 \sigma_e^2 / \langle I \rangle^2)^{-1}$ , where $\sigma_e$ denotes the mean error within a half-dataset, CC <sub>1/2</sub> is the correlation coefficient of two split data sets each derived by averaging half of the observations for a given reflection.<br><sup>d</sup> $R = \sum   F_o  -  F_c   / \sum   F_o  $ , where <i>F<sub>o</sub></i> and <i>F<sub>c</sub></i> denote observe and calculated structure factors, respectively.<br><sup>e</sup> <i>R</i> <sub>free</sub> was calculated using 5% of data excluded from refinement.<br><sup>f</sup> Calculated using Molprobitry. |                                  |                               |                               |
