# Supplementary material for: Structural Elucidation of a Protective B Cell Epitope on Outer Surface Protein C (OspC) of the Lyme Disease Spirochete, Borreliella burgdorferi
Source: PubMed Central journal article supplement (PMC10128040; doi:10.1128/mbio.02981-22), 2023-03-28

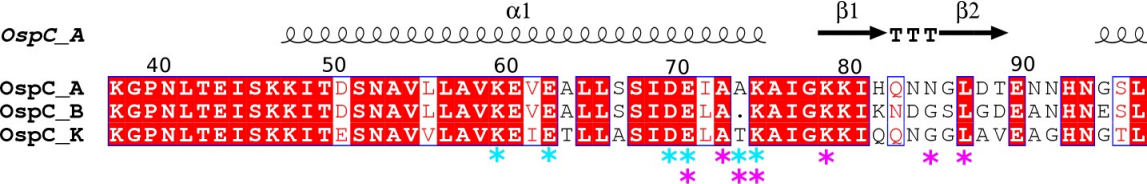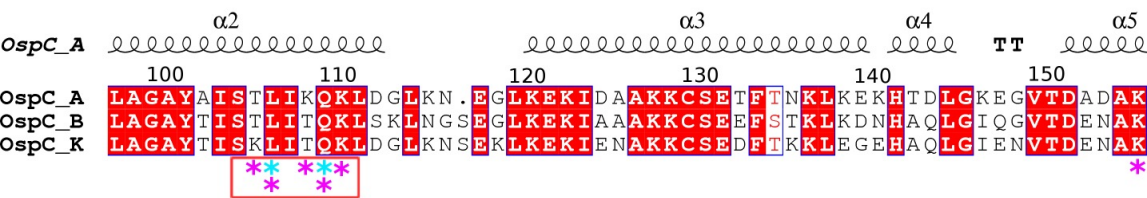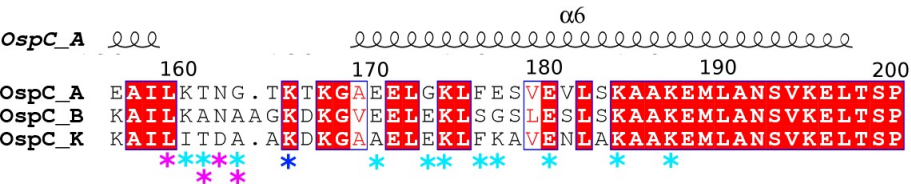

Supplement: mbio.02981-22-s0006.pdf [file mbio.02981-22-s0006.pdf]
